# Supplementary material for: Electroanalysis of the interaction between (−)-epigallocatechin-3-gallate (EGCG) and amyloid-β in the presence of copper
Source: Royal Society of Chemistry journal article supplement (doi:10.1039/c3mt20106f), 2013-01-01
Supplement: c3mt20106f.pdf [file c3mt20106f.pdf]

*Electronic Supplementary Information (ESI)*  
*for*

**Electroanalysis of the interaction between (-)-epigallocatechin-3-gallate and amyloid- $\beta$  in the presence of copper**

Biao Zhang<sup>a</sup>, Xin R. Cheng<sup>a</sup>, Iranaldo S. da Silva<sup>b</sup>, Vinci W. S. Hung<sup>a</sup>, Anthony J. Veloso<sup>a</sup>, Lúcio Angnes<sup>b</sup>, Kagan Kerman<sup>a\*</sup>

<sup>a</sup>Department of Physical and Environmental Sciences, University of Toronto Scarborough, 1265 Military Trail, Toronto, ON, M1C 1A4, Canada; <sup>b</sup>Instituto de Química, Universidade de São Paulo, 05508-000 São Paulo, Brazil.

\*Corresponding author: Tel: +1-416-287-7249; E-mail: [kagan.kerman@utoronto.ca](mailto:kagan.kerman@utoronto.ca)

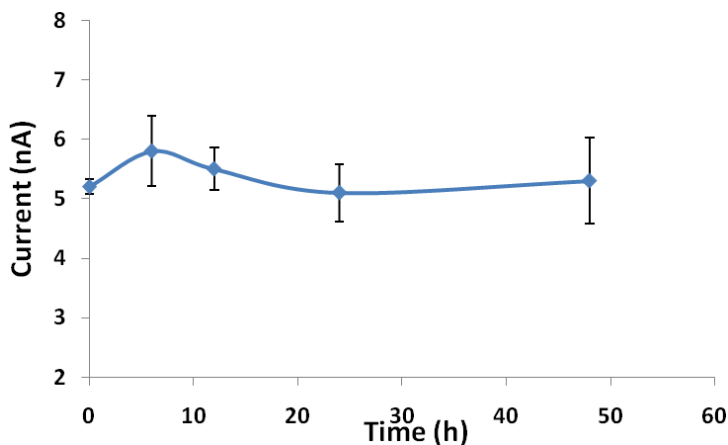

**Fig. S1** : Dependence of electrochemical oxidation peak current intensity on time with 50  $\mu$ M EGCG control in PBS. Other conditions were as described in the Experimental section.

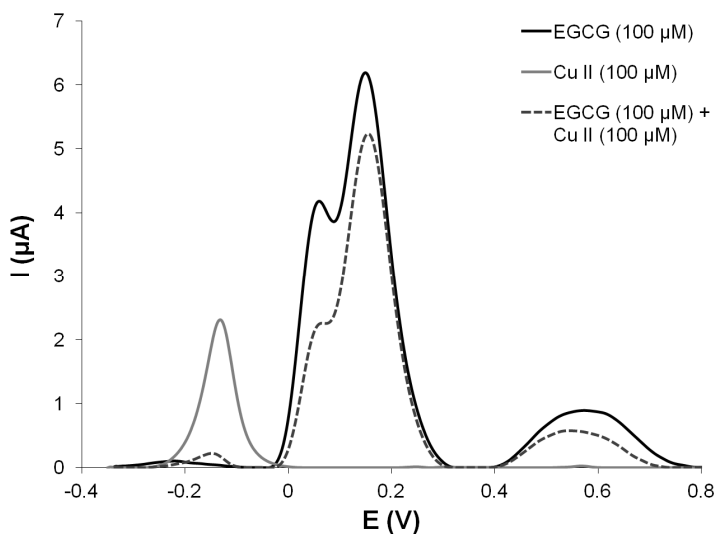

**Fig. S2:** Square-wave voltammograms of EGCG in the presence and absence of Cu(II) ions using pencil graphite electrode. Other conditions were as described in the Experimental section.

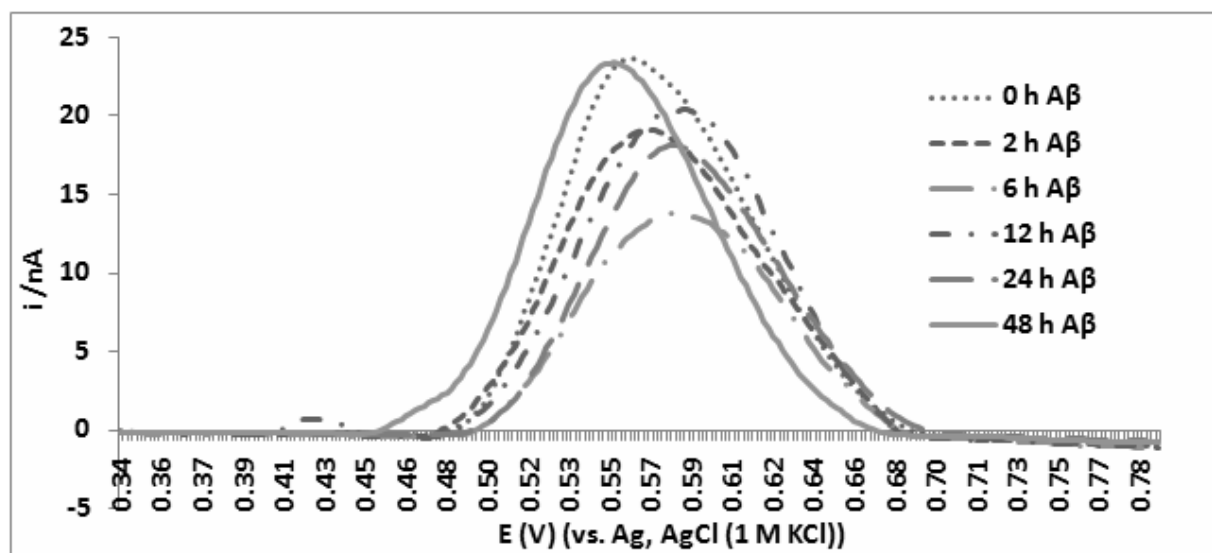

**Fig. S3A :** Square-wave voltammograms of 100  $\mu\text{M}$  A $\beta$ <sub>(1-40)</sub> control samples at 37°C in 50 mM PBS (pH 7.40) at a screen-printed carbon electrode. Other conditions were as described in the Experimental section.

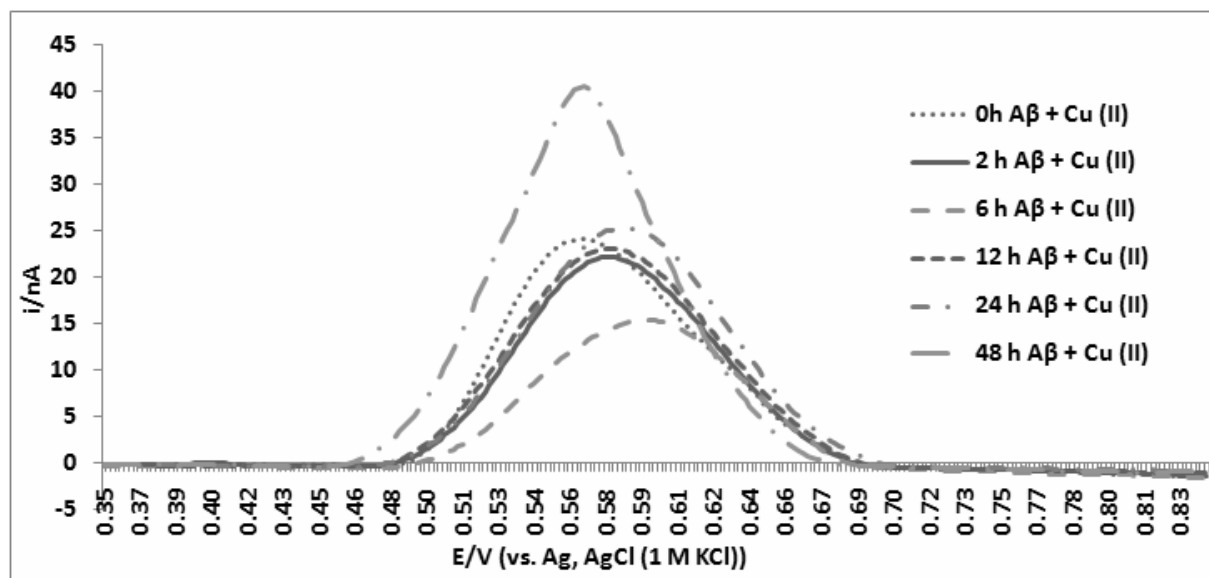

**Fig. S3B:** Square-wave voltammograms of 100  $\mu M$   $Cu(II)$  incubated with same concentration of  $A\beta_{(1-40)}$  at 37°C in 50 mM PBS (pH 7.40) at a screen-printed carbon electrode. Other conditions were as described in the Experimental section.

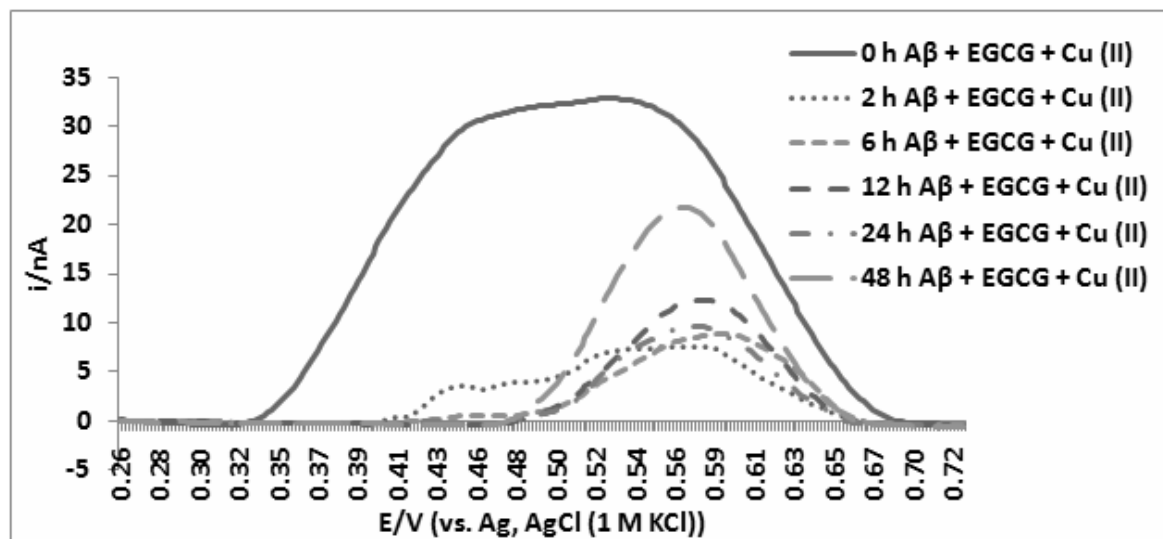

**Fig. S3C:** Square-wave voltammograms of 100  $\mu M$  EGCG in the presence of  $Cu(II)$  ions incubated with same concentration of  $A\beta_{(1-40)}$  at 37°C in 50 mM PBS (pH 7.40) at a screen-printed carbon electrode. Other conditions were as described in the Experimental section.
